# Supplementary material
Source: publisher figshare collection journal article supplement (https://acs.figshare.com/ndownloader/files/5745408)
Supplement: Supplementary file 1 [file 5745408]

## **Supporting Information**

### **Microscopic investigation of degradation processes in a polyfluorene blend by near-field scanning optical microscopy**

Shiran Nabha-Barnea<sup>1,\*</sup>, Nitzan Maman<sup>2</sup>, Iris Visoly-Fisher<sup>2, 3</sup>, Rafi Shikler<sup>1, 3</sup>

<sup>1</sup>Dept. of Electrical and Computer Eng., <sup>2</sup>Dept. of Solar Energy and Environmental Physics, Swiss Institute for Dryland Environmental and Energy Research, The Jacob Blaustein Institutes for Desert Research, <sup>3</sup>Ilse Katz Inst. For Nano-Science and Eng., Ben-Gurion University of the Negev, Be'er Sheva 8410501, Israel

\* Corresponding author E-mail address: [nabha@post.bgu.ac.il](mailto:nabha@post.bgu.ac.il)

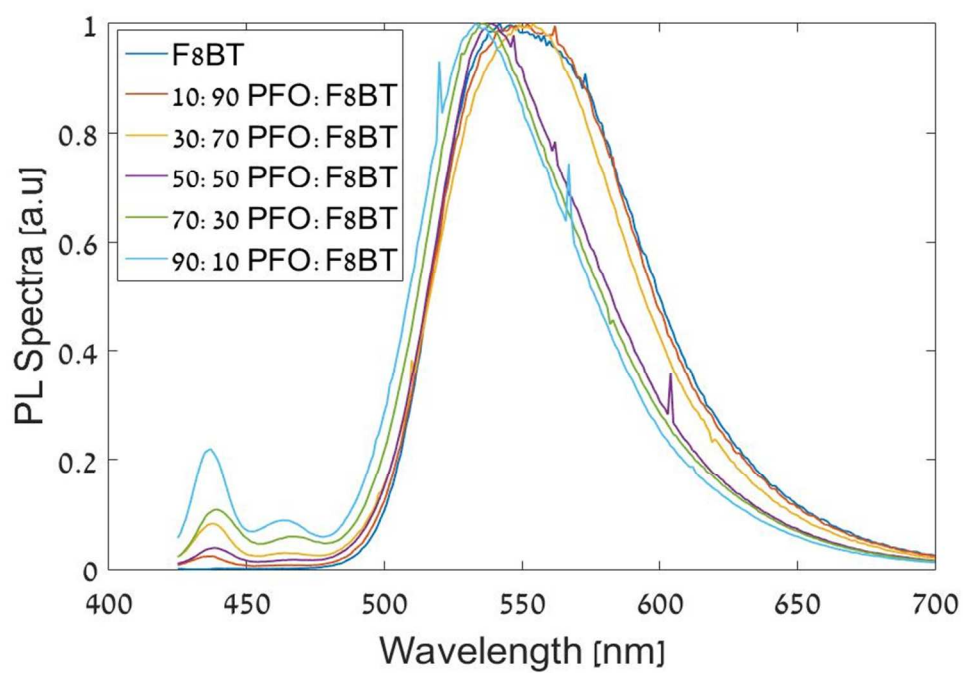

Figure S1: Normalized PL spectra of different PFO:F8BT blends and pure F8BT.

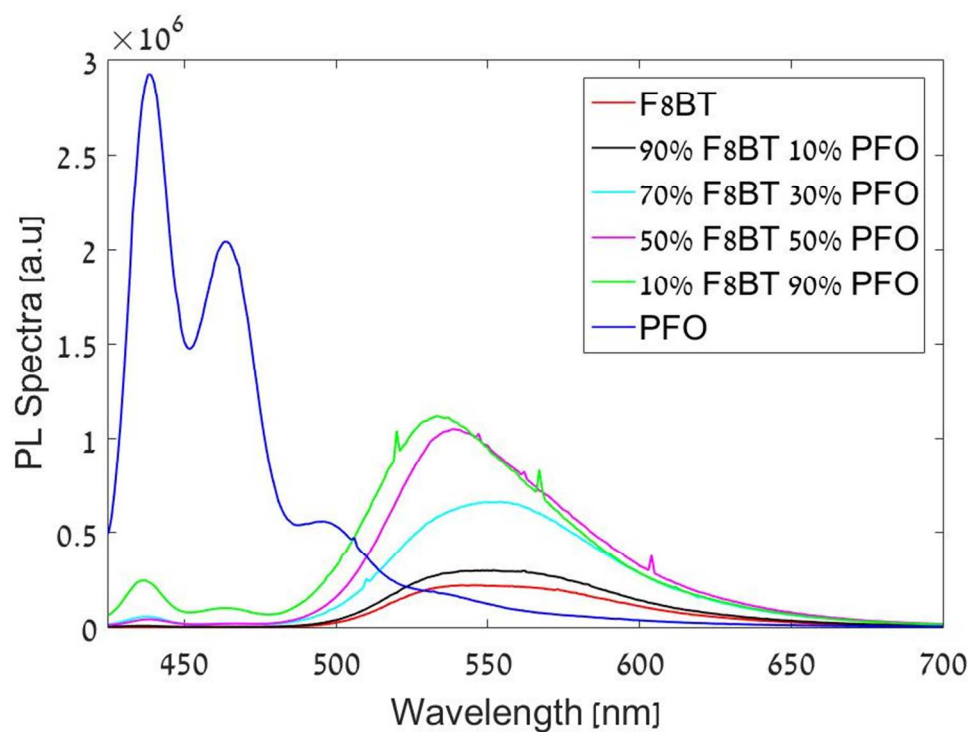

Figure S2: PL spectra of different PFO:F8BT blends and pure polymers.

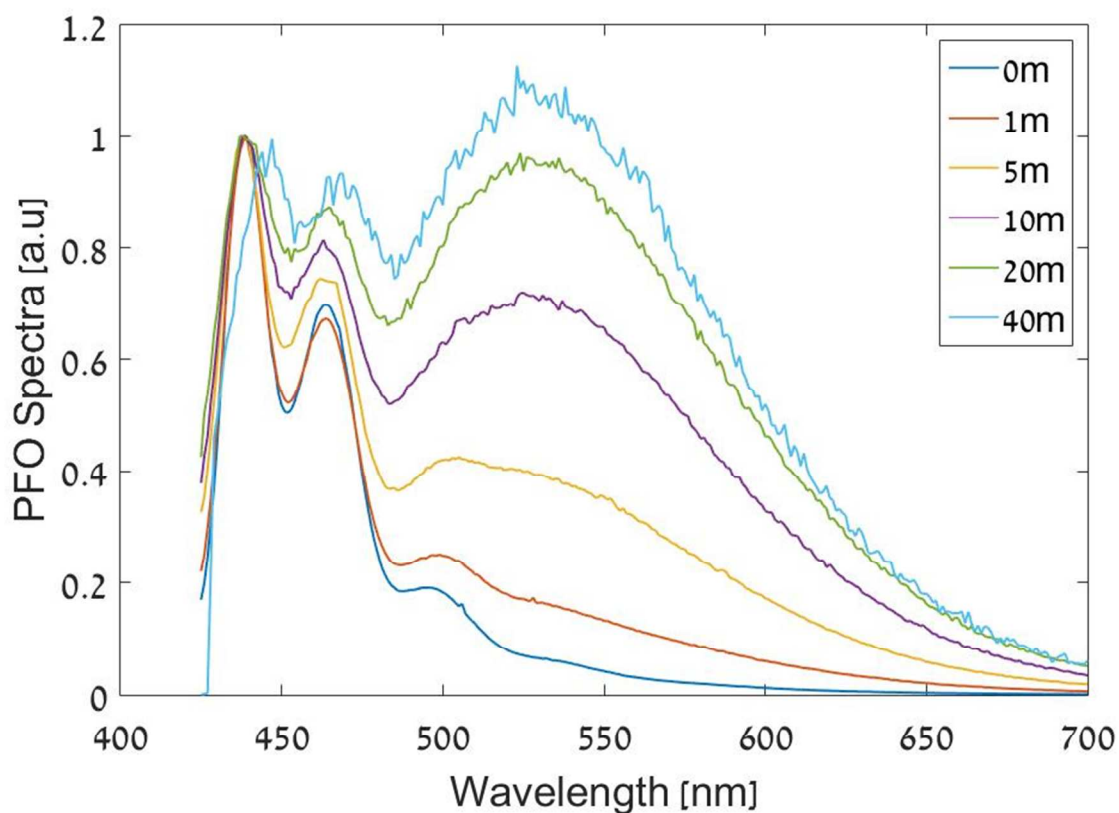

Figure S3: Normalized PFO PL spectra after 0, 1, 5, 10, 20 and 40 minutes of illumination. Increasing emission from a low-energy band at 530nm can be observed as the illumination time increased; this emission is attributed to the formation of fluorenone defect sites (keto defects) that act as trapping sites for singlet excitons which quench the PFO emission<sup>1</sup>.

<sup>1</sup>Gamerith, S.; Gadermaier, C.; Scherf, U.; List, E. J. Emission properties of pristine and oxidatively degraded polyfluorene type polymers. *physica status solidi (a)* **2004**, 201, 1132-1151.

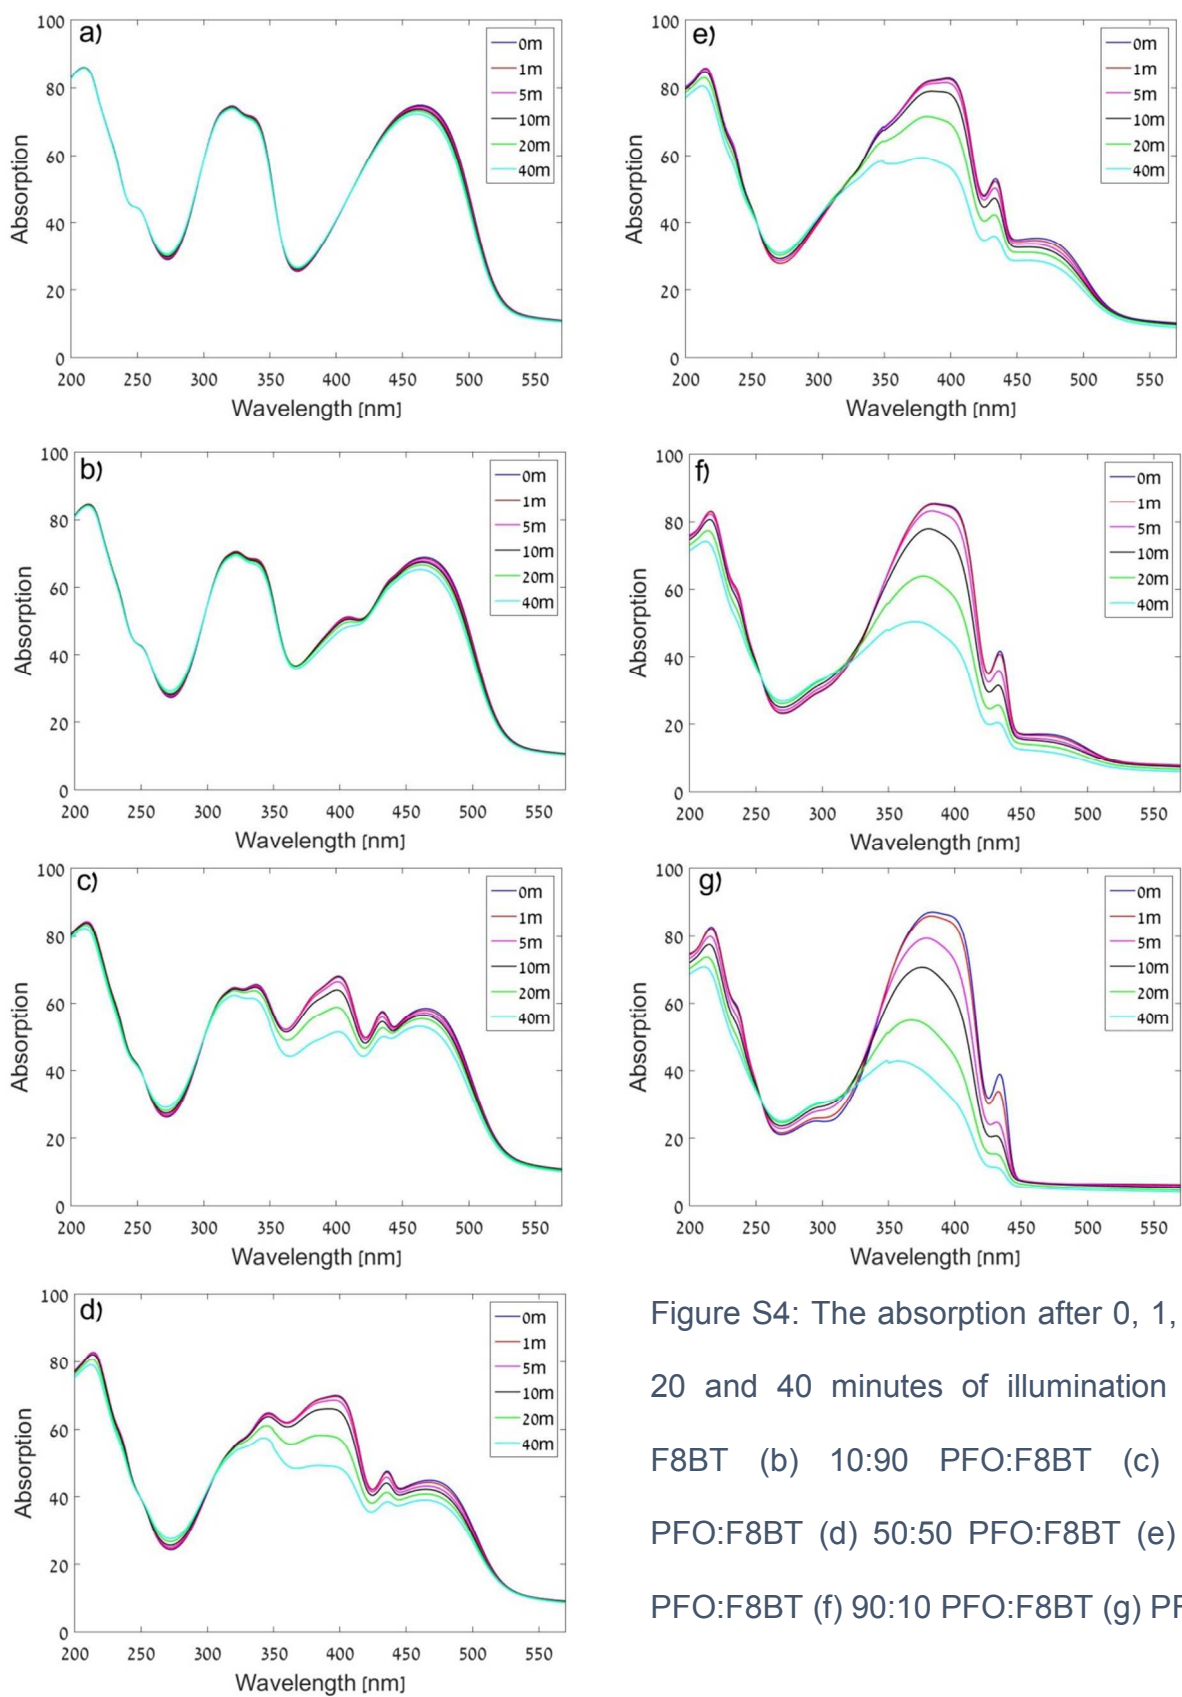

Figure S4: The absorption after 0, 1, 5, 10, 20 and 40 minutes of illumination of (a) F8BT (b) 10:90 PFO:F8BT (c) 30:70 PFO:F8BT (d) 50:50 PFO:F8BT (e) 70:30 PFO:F8BT (f) 90:10 PFO:F8BT (g) PFO.

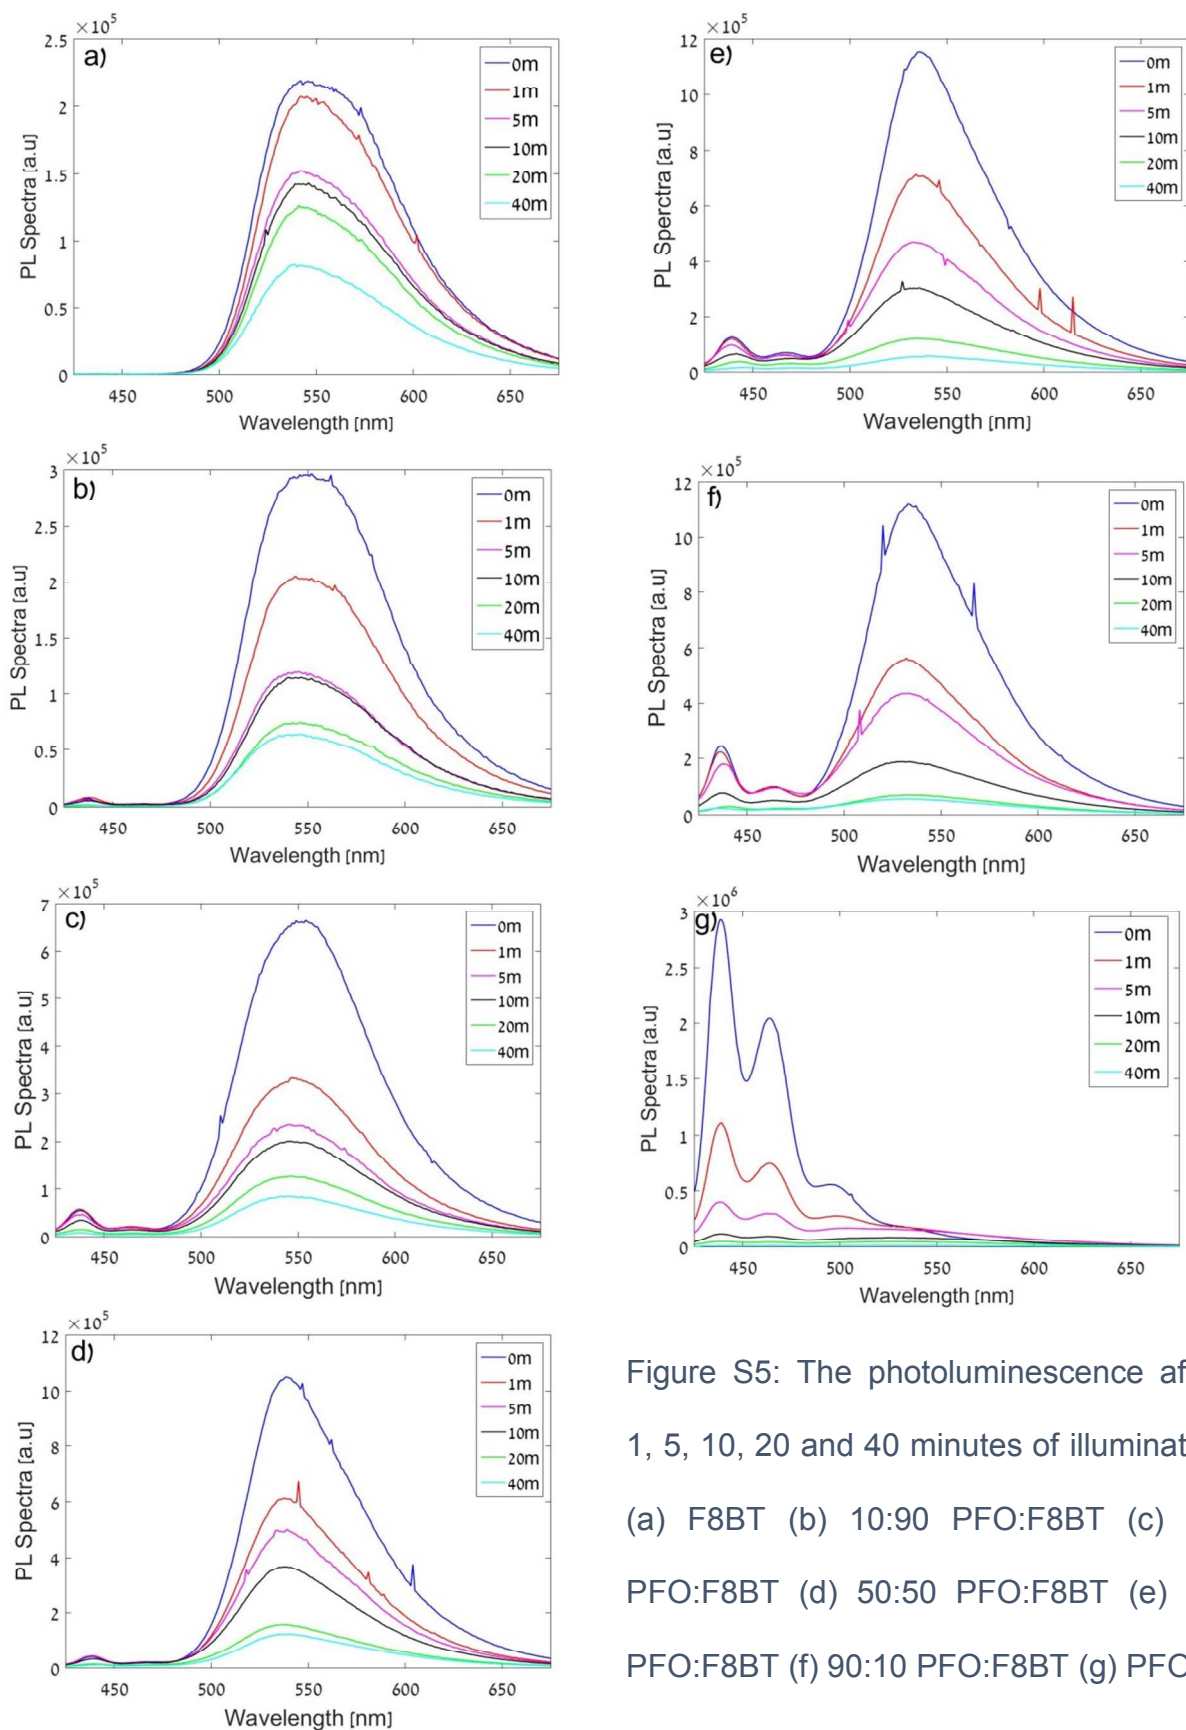

Figure S5: The photoluminescence after 0, 1, 5, 10, 20 and 40 minutes of illumination of (a) F8BT (b) 10:90 PFO:F8BT (c) 30:70 PFO:F8BT (d) 50:50 PFO:F8BT (e) 70:30 PFO:F8BT (f) 90:10 PFO:F8BT (g) PFO.
